# Supplementary material
Source: publisher site journal article supplement (https://www.dovepress.com/article/326632)
Supplement: Supplementary file 1 [file get_supplementary_file.php]

**Supplementary Table.** Clinical trials in patients with newly diagnosed diffuse large B-cell lymphoma.

| **Trial identifier** | **Phase** | **Schedule** | **Main inclusion criteria** | **Patients** | **Endpoint** | **Results (%)** | ***P*** | **Interpretation of results** | **Chapt.** | **Year** | **Ref.** |
| --- | --- | --- | --- | --- | --- | --- | --- | --- | --- | --- | --- |
| --- | III | m-BACOD vs. ProMACE-CytaBOM vs. MACOP-B vs. CHOP | stage II–IV | 223 / 233 / 218 / 225 | OS  at 3 y. | 52 / 50 / 50 / 54 | 0.90 | Intensified regimens are not superior to CHOP. | 4.1 | 1993 | 47 |
| --- | III | R-CHOP  vs. CHOP | 60–80 y., stage II–IV, PS ≤ 2 | 202 / 197 | EFS  at 2 y. | 57 / 38 | <0.01 | R-CHOP is superior to CHOP. | 4.1 | 2002 | 49 |
| --- | III | R-CHOP  vs. CHOP | > 60 y., PS ≤ 3 | 267 / 279 | FFS  at 2 y. | 53 / 46 | 0.04 | R-CHOP is superior to CHOP. | 4.1 | 2006 | 50 |
| --- | III | R-CHOP  vs. CHOP | 18–60 y., PS ≤ 3 | 413 / 410 | EFS  at 6 y. | 74 / 56 | <0.01 | R-CHOP > CHOP in younger patients. | 4.1 | 2011 | 51 |
| NCT00052936 RICOVER-60 | III | CHOP-14 (6) vs. CHOP-14 (8) vs. R-CHOP-14 (6) vs. R-CHOP-14 (8) | 61–80 y., PS 0–2 | 307 / 305 / 306 / 304 | EFS  at 3 y. | 47 / 53 / 67 / 63 | <0.01 | 6x of R-CHOP-14 is superior to other tested regimens. | 4.1 | 2008 | 52 |
| SWOG-8736 | III | CHOP-21 (3) + RT  vs. CHOP-21 (8) | stage I–II, PS ≤ 2 | 200 / 201 | PFS  at 5 y. | 77 / 64 | 0.03 | 3x CHOP + RT is superior to 8x CHOP. | 4.2 | 1998 | 55 |
| SWOG-8736 | III | CHOP-21 (3) + RT  vs. CHOP-21 (8) | stage I–II, PS ≤ 2 | 158 / 150 | PFS  median | 11.1 / 12.0 y. | 0.73 | No difference of long-term survival of the regimens. | 4.2 | 2016 | 56 |
| SWOG S0014 | II | R-CHOP-21 (3) + RT (single-arm) | stage I–II, PS ≤ 2,  IPI ≥ 1 | 60 | PFS  at 4 y. | 88 | NA | 3x R-CHOP + RT is effective in comparison to SWOG-8736. | 4.2 | 2008 | 57 |
| NCT00841945 | III | R-CHOP-14 (4-6) + RT  vs. R-CHOP-14 (4-6) | 18–75 y., stage I–II | 164 / 163 | EFS  at 5 y. | 92 / 89 | 0.18 | R-CHOP is not inferior to R-CHOP + RT in limited-stage disease. | 4.2 | 2018 | 59 |
| NCT00278421 "FLYER" | III | R-CHOP-21 (4) + R (2)  vs. R-CHOP-21 (x6) | 18–60 y., stage I–II,  PS 0–1, aaIPI 0 | 297 / 295 | PFS  at 3 y. | 96 / 94 | NS | 4x R-CHOP-21 + 2x R is not inferior to 6x R-CHOP-21 in young patients. | 4.2 | 2019 | 58 |
| NCT01359592 S1001 | II | R-CHOP-21 (3) + R(I)T  vs. R-CHOP-21 (4) | stage I–II, PS ≤ 2 | 12 / 111 | PFS  at 5 y. | 86 / 89 | NA | 4x R-CHOP-21 is recommended for most limited-stage diseases. | 4.2 | 2020 | 60 |
| NCT01087424 | II | R-miniCHOP-21 (6)  (single-arm) | > 80 y. | 149 | OS  at 2 y. | 59 | NA | R-miniCHOP is safe and effective in patients aged > 80 years. | 4.3 | 2011 | 61 |
| NCT01195714 | II | Ofatumumab + miniCHOP (6)  (single-arm) | > 80 y. | 120 | OS  at 2 y. | 65 | NA | Ofatumumab improves OS. | 4.3 | 2017 | 64 |
| NCT04799275 | II/III | Azacitidine + R-miniCHOP vs. R-miniCHOP | ≥ 75 y., PS ≤ 2 | recruiting (est. 422) | safety + OS |  |  | Est. primary completion 3/2025. | 4.3 |  | 66 |

**Supplementary Table (continued).**

| **Trial identifier** | **Phase** | **Schedule** | **Main inclusion criteria** | **Patients** | **Endpoint** | **Results (%)** | ***P*** | **Interpretation of results** | **Chapt.** | **Year** | **Ref.** |
| --- | --- | --- | --- | --- | --- | --- | --- | --- | --- | --- | --- |
| NHL-B2 | III | CHOP-21  vs. CHOP-14 | 61–75 y., PS ≤ 3 | 178 / 172 | EFS  at 5 y. | 33 / 44 | <0.01 | CHOP-14 is superior to CHOP-21. | 5.1 | 2004 | 69 |
| ISCRTN 16017947 | III | R-CHOP-14 (6)  vs. R-CHOP-21 (8) | ≥ 18 y., PS ≤ 2 | 536 / 535 | OS  at 2 y. | 83 / 81 | 0.38 | R-CHOP-14 is not superior to R-CHOP-21. | 5.1 | 2013 | 70 |
| NCT00140595 | III | R-ACVBP (4) + consolid.  vs. R-CHOP-21 (8) | 18–59 y., aaIPI ≤ 1 | 196 / 183 | EFS  at 5 y. | 81 / 67 | <0.01 | R-ACVBP improves survival with increased toxicity. | 5.1 | 2011 | 71 |
| NCT00129090 | III | R-CHOEP-14 (8)  vs. R-megaCHOEP-21 (4) | 18–60 y., aaIPI 2–3 | 130 / 132 | EFS  at 3 y. | 70 / 61 | 0.14 | R-megaCHOEP is not superior to R-CHOEP in young high-risk patients. | 5.1 | 2012 | 75 |
| NCT00118209  Alliance | III | DA-EPOCH-R-21 (6)  vs. R-CHOP-21 (6) | 18–60 y., stage II–IV,  PS ≤ 2 | 241 / 250 | PFS  at 2 y. | 79 / 76 | 0.64 | DA-EPOCH-R is more toxic and does improve survival. | 5.1 | 2019 | 76 |
| NCT01092182 | II | DA-EPOCH-R-21 (6)  (single-arm) | *MYC* rearrangement,  ≥ 18 y. | 53 | EFS  at 2 y. | 71 | NA | DA-EPOCH-R has durable remissions in *MYC*-rearranged B-NHL. | 5.1 | 2018 | 77 |
| JCOG060 | II/III | dose-dense R + CHOP  vs. R-CHOP | 20–79 y., PS ≤ 2 | 208 / 213 | PFS  at 3 y. | 80 / 79 | 0.39 | Dose-dense rituximab + CHOP does not improve PFS. | 5.2 | 2021 | 78 |
| NCT00129090  DENSE | II/III | dose-dense R + megaCHOEP | 18–60 y., aaIPI 2–3 | 78 | EFS  at 2 y. | 69 | NA | Doubling the R infusions concomitant + CHOEP does not improve survival. | 5.2 | 2018 | 79 |
| HOVON-84 | III | RR-CHOP-14  vs. R-CHOP-14 | 18–80 y., stage II–IV, aaIPI ≤ 3, PS ≤ 2 | 288 / 286 | CR | 86 / 89 | 0.44 | Early rituximab intensification during R-CHOP-14 does not improve survival. | 5.2 | 2020 | 80 |
| NCT00355199 | III | R-high-dose therapy + ASCT vs. R-CHOP-14 | 18–65 y., stage II–IV,  IPI 3–5, PS ≤ 2 | 113 / 122 | EFS  at 3 y. | 65 / 62 | 0.83 | R-high-dose therapy with ASCT does not improve survival. | 6 | 2016 | 83 |

**Supplementary Table (continued).**

| **Trial identifier** | **Phase** | **Schedule** | **Main inclusion criteria** | **Patients** | **Endpoint** | **Results (%)** | ***P*** | **Interpretation of results** | **Chapt.** | **Year** | **Ref.** | |
| --- | --- | --- | --- | --- | --- | --- | --- | --- | --- | --- | --- | --- |
| NCT01287741 GOYA | III | obinutuzumab + CHOP  vs. R-CHOP | ≥ 18 y., IPI 2–5 or IPI 1 ≤ 60 y., PS ≤ 2 | 704 / 710 | PFS  at 5 y. | 64 / 63 | 0.48 | Obinutuzumab plus CHOP does not improve PFS over R-CHOP. | 7.1 | 2020 | | 54 | |
| NCT03274492 POLARIX | III | Pola-R-CHP  vs. R-CHOP | 18–80 y., IPI 2–5,  PS ≤ 2 | 440 / 439 | PFS  at 2 y. | 77 / 70 | 0.02 | Pola-R-CHP improves PFS in comparison to R-CHOP. | 7.2 | 2022 | | 88 | |
| NCT03244176 | Ib/II | avelumab + R,  R-CHOP (6) | ≥ 18 y., stage II–IV,  PS ≤ 2 | 28 | ORR  safety | 60 | NA | Avelumab + rituximab is safe with high ORR after 2 cycles. | 7.3.1 | 2020 | | 95 | |
| NCT03023878 | II | R-chemotherapy  + blinatumomab | ≥ 18 y., IPI 3–5,  PS 0–2 | 28 | ORR  safety | 89 | NA | Blinatumomab after the first-line R-chemotherapy was safe. | 7.3.1 | 2019 | | 98 | |
| NCT03677154 GO40554 | Ib/II | mosunetuzumab monotherapy | ≥ 80 y., ≥ 60 y. ineligible for R–CHOP | 40 | ORR  safety | 68 | NA | Mosunetuzumab is safe and effective with durable responses. | 7.3.1 | 2021 | | 100 | |
| NCT03467373 | Ib | glofitamab + (R vs. G) + CHOP | ≥ 18 y., PS ≤ 3 | recruiting (est. 172) | safety |  |  | Est. primary completion 12/2023. | 7.3.2 |  | |  | |
| NCT04914741 COALITION | Ib/II | glofitamab-R-CHOP vs. glofitamab-Pola-R-CHP | 18–65 y., IPI 3–5,  PS ≤ 1 | recruiting (est. 80) | safety |  |  | Est. primary completion 1/2024. | 7.3.2 |  | |  | |
| NCT04980222 | II | glofitamab + R-CHOP | ≥ 18 y., IPI 1–5, PS ≤ 2, high-risk ctDNA | recruiting (est. 40) | CR |  |  | Est. primary completion 12/2024. | 7.3.2 |  | |  | |
| NCT03677141 GO40515 | Ib/II | mosunetuzumab  + CHOP | ≥ 18 y., stage II–IV,  IPI 2–5, PS 0–2 | 43 | ORR  safety | 86 | NA | Mosunetuzumab + R-CHOP is safe and effective. | 7.3.2 | 2020 | | 101 | |
| NCT4663347 EPCORE NHL-2 | Ib/II | epcoritamab  + R-chemotherapy | ≥ 18 y., PS ≤ 2, B-NHL | recruiting (est. 130) | ORR  safety |  |  | Est. primary completion 4/2023. | 7.3.2 |  | |  | |
| NCT02290951 ELM-1 | I | odronextamab monotherapy | ≥ 18 y., PS ≤ 1 | recruiting (est. 256) | ORR  safety |  |  | Est. primary completion 8/2025. | 7.3.2 |  | |  | |
| NCT03761056 ZUMA-12 | II | Axi-cel as part  of first-line therapy | ≥ 18 y., DHL/THL  or IPI 3–5, PS ≤ 1 | 37 | ORR (CR) | 89 (78) | NA | Axi-cel is safe and effective in high-risk DLBCL/HGBL. | 7.3.3 | 2022 | | 105 | |

**Supplementary Table (continued).**

| **Trial identifier** | **Phase** | **Schedule** | **Main inclusion criteria** | **Patients** | | **Endpoint** | **Results (%)** | ***P*** | **Interpretation of results** | **Chapt.** | **Year** | | **Ref.** |
| --- | --- | --- | --- | --- | --- | --- | --- | --- | --- | --- | --- | --- | --- |
| NCT02285062 ROBUST | III | lenalidomide + R-CHOP vs. R-CHOP | 18–65 y., ABC,  stage II–IV, IPI 2–5 | 285 / 285 | | PFS  at 2 years | 67 / 64 | 0.29 | Lenalidomide + R-CHOP does not improve PFS. | 7.3.4 | 2021 | | 107 |
| 2014-002654-39 HOVON | II | lenalidomide + R-CHOP (single-arm) | MYC-rearrangement,  ≥ 18 y., stage II–IV | 82 | | CR rate | 67 | NA | Lenalidomide + R-CHOP is safe with responses comparable to more intensive regimens. | 7.3.4 | 2020 | | 108 |
| NCT04134936 First-MIND | Ib | tafasitamab-lenalidomide-R-CHOP  vs. lenalidomide-R-CHOP | ≥ 18 y., IPI 2–5,  PS ≤ 2 | 33 / 33 | | ORR  safety | 94 / 90 | NA | Tafasitamab-lenalidomide-R-CHOP is a tolerable regimen. | 7.3.4 | 2021 | | 110 |
| NCT04824092 FRONT-MIND | III | tafasitamab-lenalidomide-R-CHOP  vs. R-CHOP | 18–80 y., IPI 3–5,  PS ECOG ≤ 2 | recruiting (est. 880) | | PFS |  |  | Est. primary completion 6/2025. | 7.3.4 | 2022 | | 111 |
| NCT02636322 SMART Start | II | R + ibrutinib + lenalidomide | ≥ 18 y., non-GCB, PS ≤ 2 | 60 | | ORR | 86 | NA | A highly effective chemo-free regimen. | 7.3.4 | 2019 | | 112 |
| NCT01324596  REMoDL-B | III | bortezomib + R-CHOP  vs. R-CHOP | 20–86 y. | 459 / 459 | PFS  at 2.5 y. | | 74 / 70 | 0.28 | Bortezomib + R-CHOP does not improve PFS. | 8.2 | | 2019 | 117 |
| NCT02055820 CAVALLI | II | venetoclax + R-CHOP  vs. R-CHOP (GOYA) | 18–80 y., IPI 2–5,  PS ≤ 2 | 206 | CR rate | | 69 / 63 | NA | Venetoclax + R-CHOP increases both toxicity and efficacy. | 8.3 | | 2021 | 120 |
| NCT03984448 | II/III | venetoclax  + DA-EPOCH-R  vs. DA-EPOCH-R | ≥ 18 y., double-hits,  PS ≤ 2 | 36 / 30 | | ORR  safety | 88 / 79 | NA | DA-EPOCH-R + venetoclax in double-hits resulted in excess treatment-related mortality. | 8.3 | 2021 | | 121 |

aaIPI, age adjusted International Prognostic Index; ABC, activated B-cell–like; ASCT, autologous stem cell transplantation, Axi-cel, axicabtagene ciloleucel; B-NHL, B-cell non-Hodgkin lymphoma; Chapt., chapter; CR, complete remission; ctDNA, circulating tumor DNA; DHL/THL, double-hit lymphoma/triple-hit lymphoma; EFS, event-free survival; Est., estimated; G, obinutuzumab; GCB, germinal center B-cell–like; HGBL, high-grade B-cell lymphoma; IPI, International Prognostic Index; NA, not available; NS, not significant; OS, overall survival; ORR, overall response rate; PFS, progression-free survival; PS, performance status; R, rituximab; R-IPI, revised International Prognostic Index; Ref., reference; y., years.
